# Supplementary material for: Nondoped deep-blue spirofluorenexanthene-based green organic semiconductors (GOS) via a pot, atom and step economic (PASE) route combining direct arylation with tandem reaction
Source: Royal Society of Chemistry journal article supplement (doi:10.1039/c4tc01963f), 2014-10-23
Supplement: c4tc01963f1.pdf [file c4tc01963f1.pdf]

## Supporting Information

### **Nondoped Deep-blue Spirofluorenexanthene-based Green Organic Semiconductors via a Pot, Atom and Step Economic (PASE) Route Combining Direct Arylation and Tandem Reactions**

*Ming-Li Sun<sup>a</sup>, Wen-Sai Zhu<sup>c</sup>, Zhen-Song Zhang<sup>b</sup>, Chang-Jin Ou<sup>a</sup>, Ling-Hai Xie<sup>a,\*</sup>,*

*Yang Yang<sup>c</sup>, Yan Qian<sup>a</sup>, Yi Zhao<sup>b</sup>, Wei Huang<sup>a,c,\*</sup>*

*<sup>a</sup>Center for Molecular Systems and Organic Devices (CMSOD), Key Laboratory for Organic Electronics & Information Displays (KLOEID) and Institute of Advanced Materials (IAM), Nanjing University of Posts & Telecommunications, Nanjing 210046, Jiangsu, China*

*<sup>b</sup>State Key Laboratory of Integrated Optoelectronics, College of Electronics Science and Engineering, Jilin University, Changchun 130012, Jilin, China*

*<sup>c</sup>Jiangsu-Singapore Joint Research Center for Organic/Bio-Electronics & Information Displays and Institute of Advanced Materials (IAM), Nanjing Tech University, Nanjing 211816, Jiangsu, China*

E-mail: [wei-huang@njtech.edu.cn](mailto:wei-huang@njtech.edu.cn) ; [iamlhxie@njupt.edu.cn](mailto:iamlhxie@njupt.edu.cn)

Fax: +86 25 5813 9988; Tel: +86 25 5813 9001

## EXPERIMENTAL SECTION

**Chemicals.** All reagents were purchased from Sigma-Aldrich, Merck and Alfa Aesar, and used as received unless stated otherwise. Anhydrous THF (HPLC grade) was collected from Solvent Purification Systems (Innovative Technology, Inc.). Anhydrous chloroform was pre-dried over molecular sieves.

**Characterization:**  $^1\text{H-NMR}$  in  $\text{CDCl}_3$  was recorded at 400 MHz using a Varian Mercury 400 plus spectrometer. For the MALDI-TOF MS spectra, the spectra were recorded in reflective mode, no substrates were used. Elemental analyses were carried out on an Elementar Analysensysteme GmbH Vario EL *III* Instrument. Absorption spectra were measured with a Shimadzu UV-3150 spectrometer and emission spectra were recorded on a Shimadzu RF-530XPC luminescence spectrometer. Differential scanning calorimetry (DSC) analyses were performed on a Shimadzu DSC-60A Instrument. Thermogravimetric analyses (TGA) were conducted on a Shimadzu DTG-60H thermogravimetric Analyzer under a heating rate of  $10^\circ\text{C}/\text{min}$  and a nitrogen flow rate of  $20\text{ cm}^3/\text{min}$ . Cyclic voltammetric (CV) studies were conducted using an CHI600C in a typical three-electrode cell with a platinum sheet working electrode, a platinum wire counter electrode, and a silver/silver nitrate ( $\text{Ag}/\text{Ag}^+$ ) reference electrode.

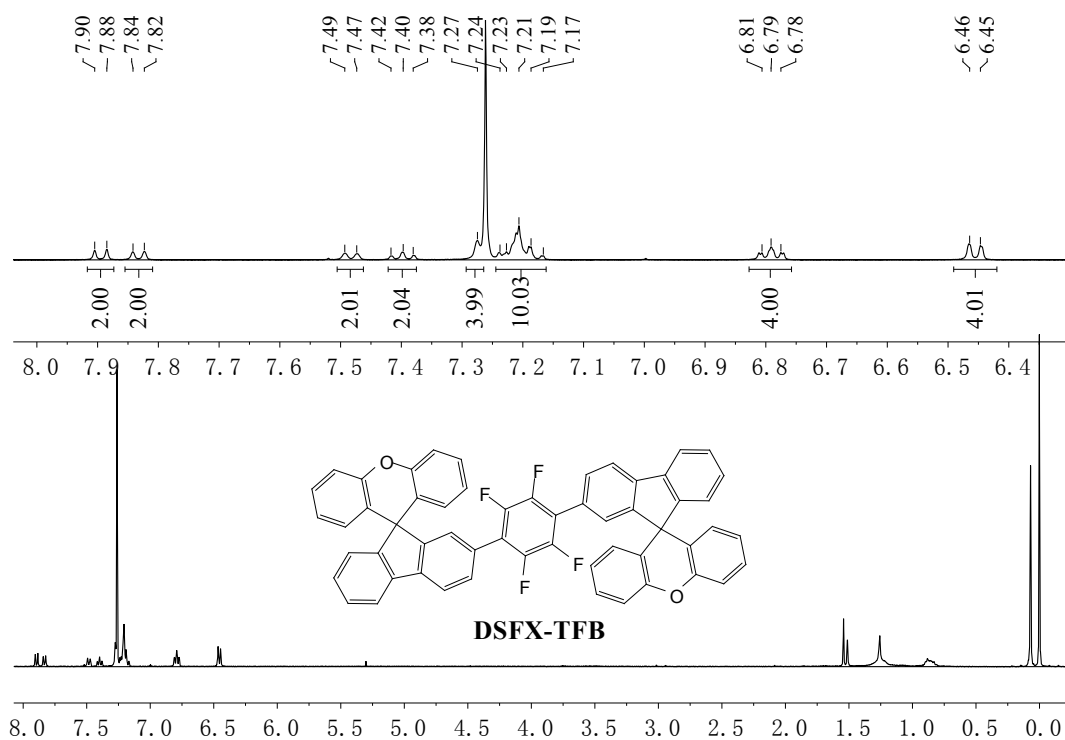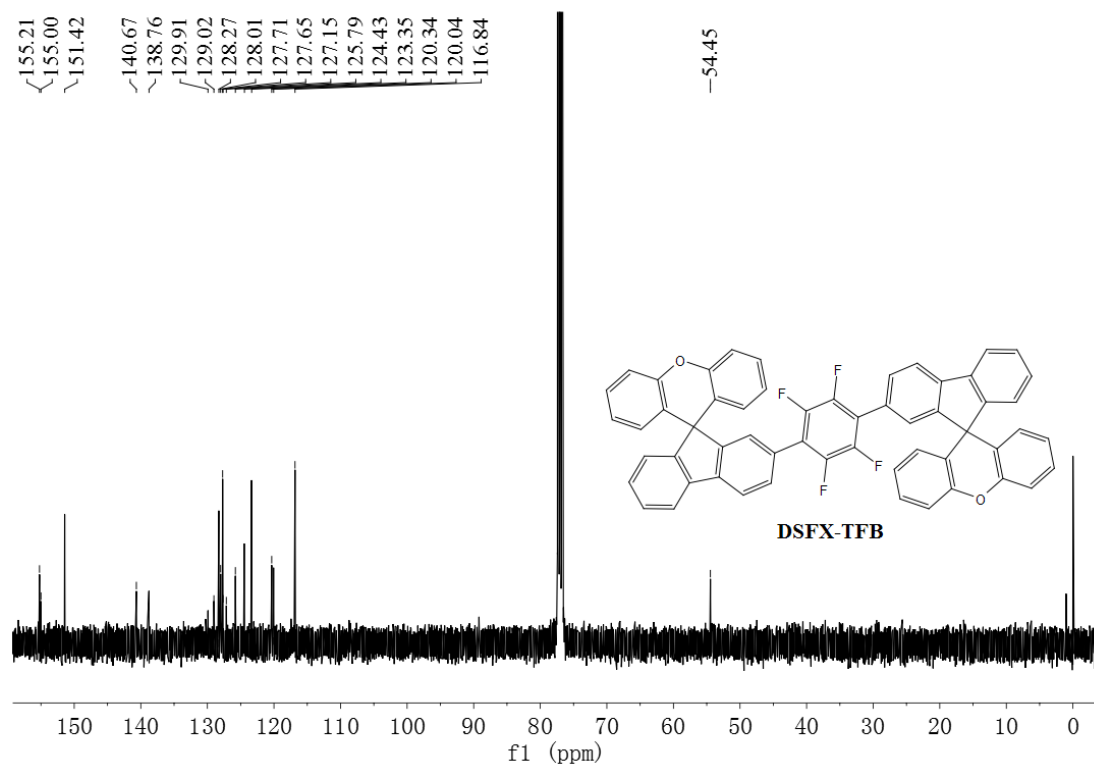

<sup>13</sup>C NMR (101 MHz, CDCl<sub>3</sub>) δ 155.21 (s), 155.00 (s), 151.43 (s), 140.67 (s), 138.88 – 138.68 (m), 129.91 (s), 129.02 (s), 128.28 (s), 128.01 (s), 127.71 (s), 127.65 (s), 127.15 (s), 125.79 (s), 124.47 (s), 123.36 (s), 120.34 (s), 120.06 (s), 116.84 (s), 54.45 (s).

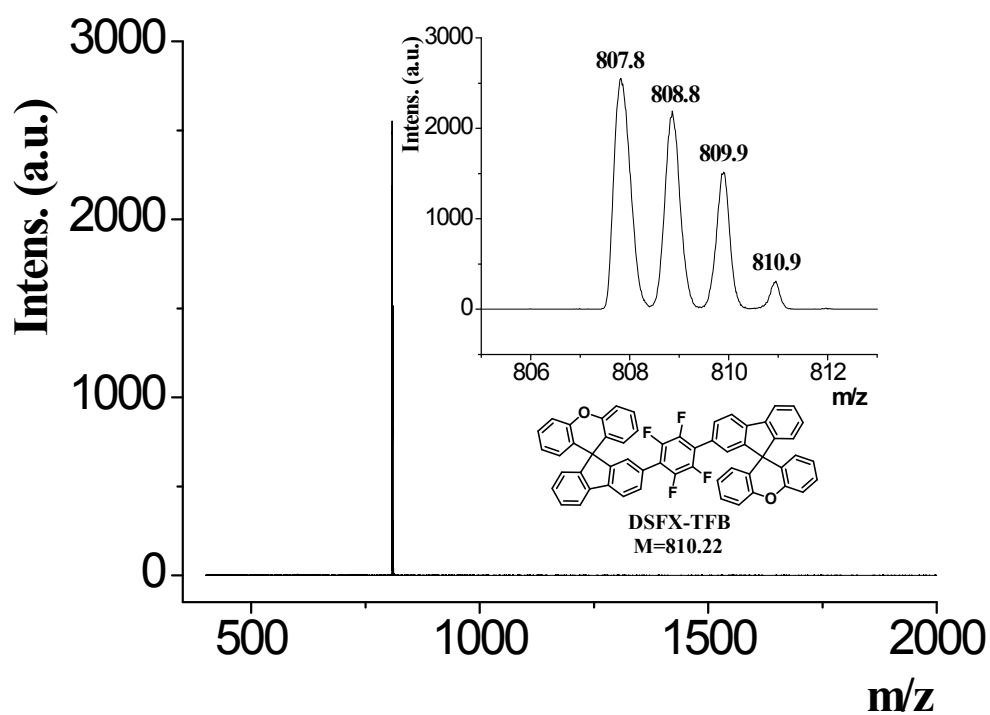

Figure S1.  $^1\text{H-NMR}$ ,  $^{13}\text{C-NMR}$  and MALDI-TOF mass spectra of DSFX-TFB.

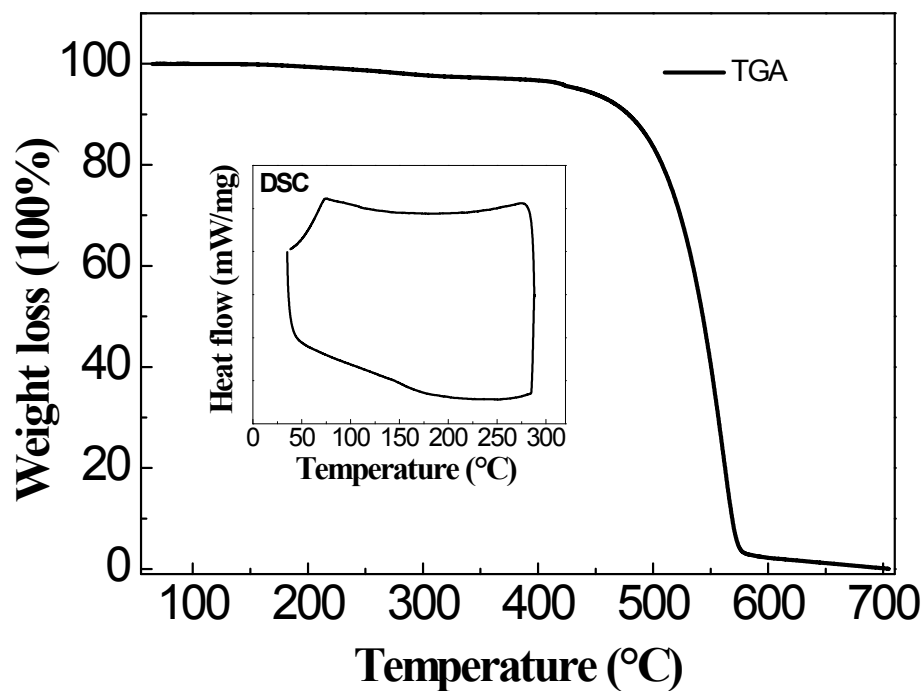

Figure S2. The TGA and DSC curve of DSFX-TFB.

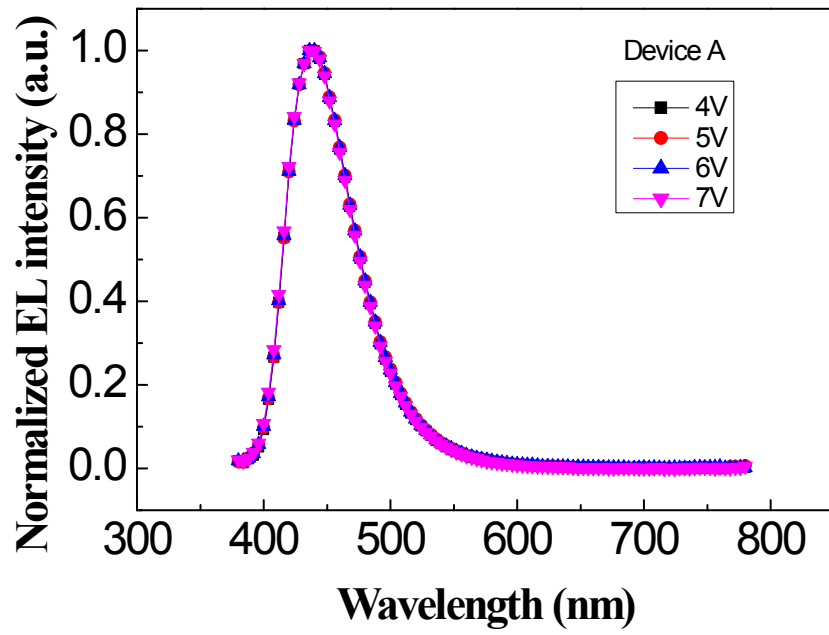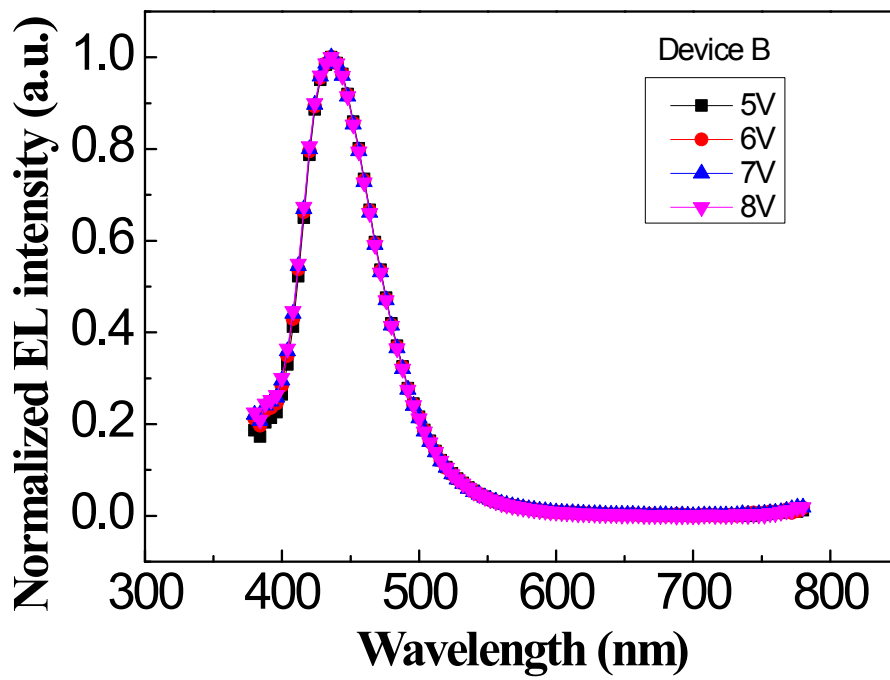

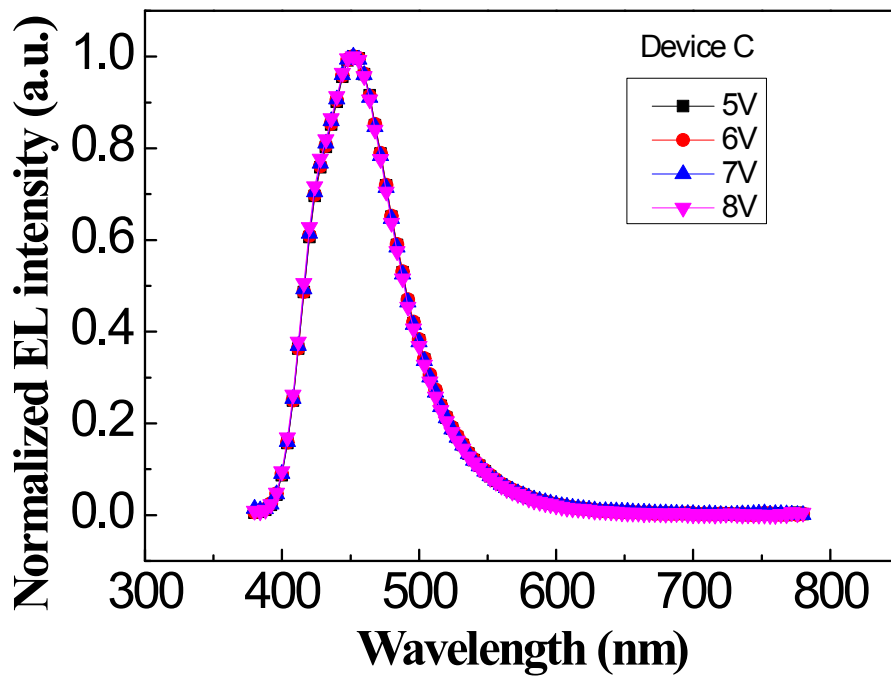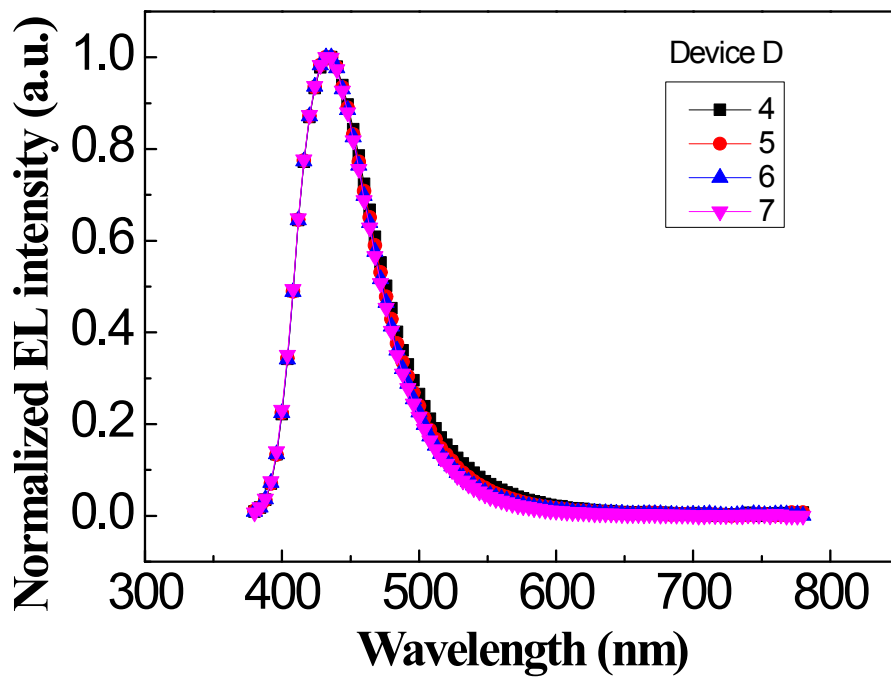

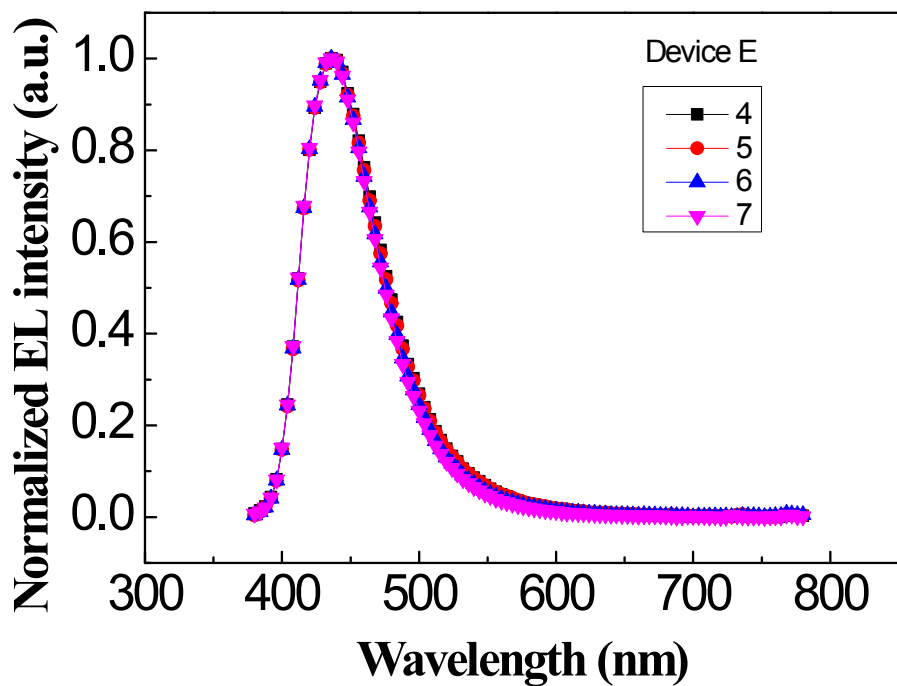

Figure S3. Normalized EL spectra of device A-E at the different Voltage.

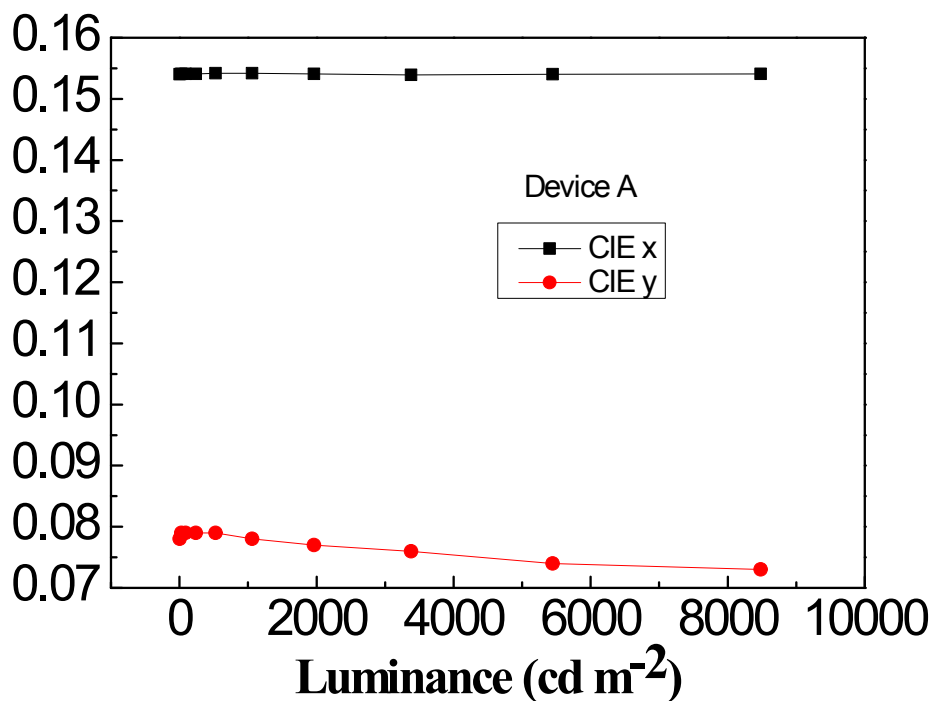

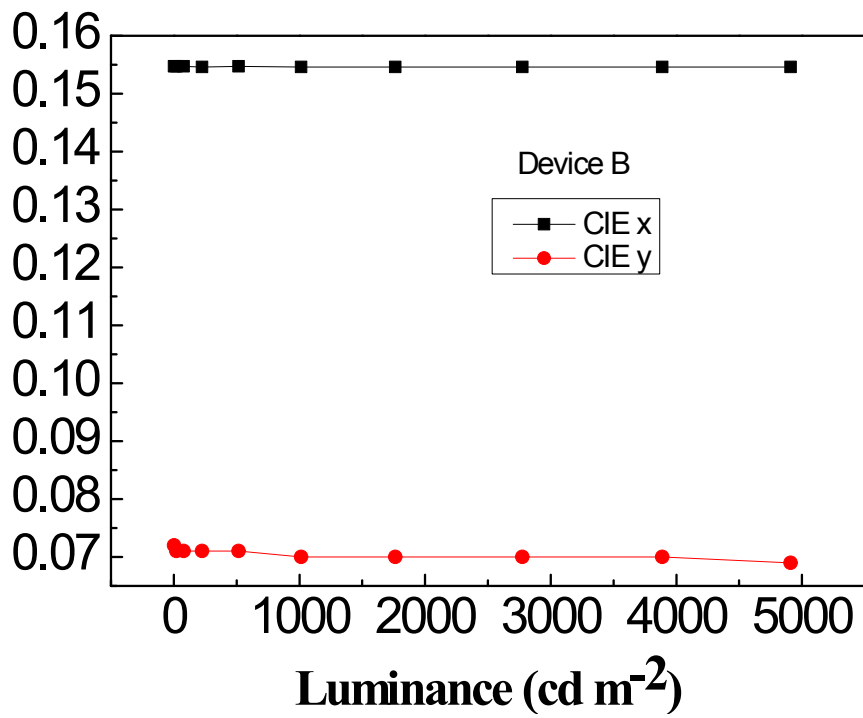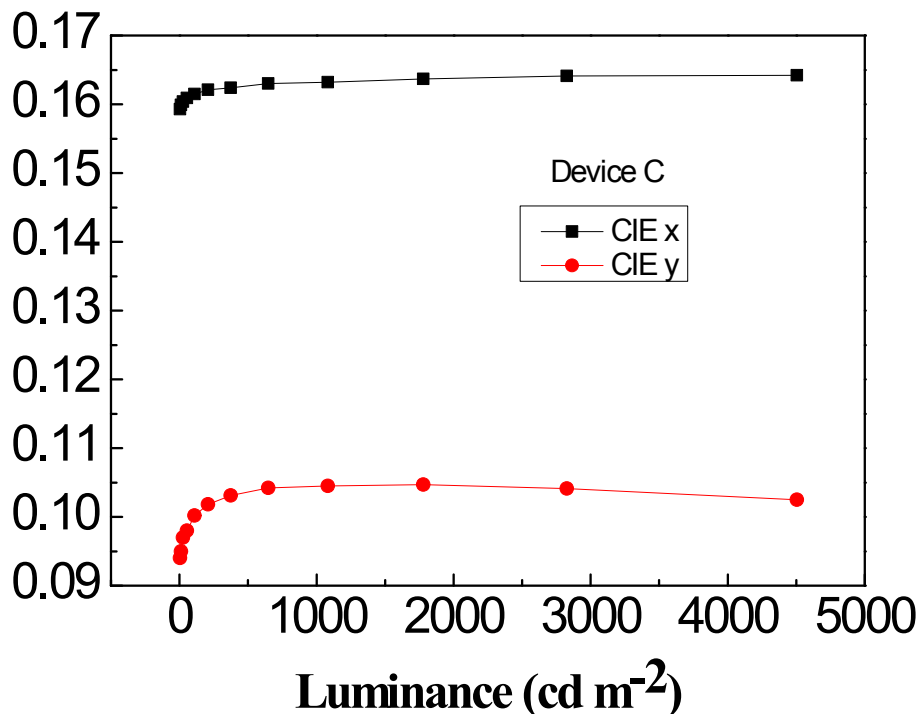



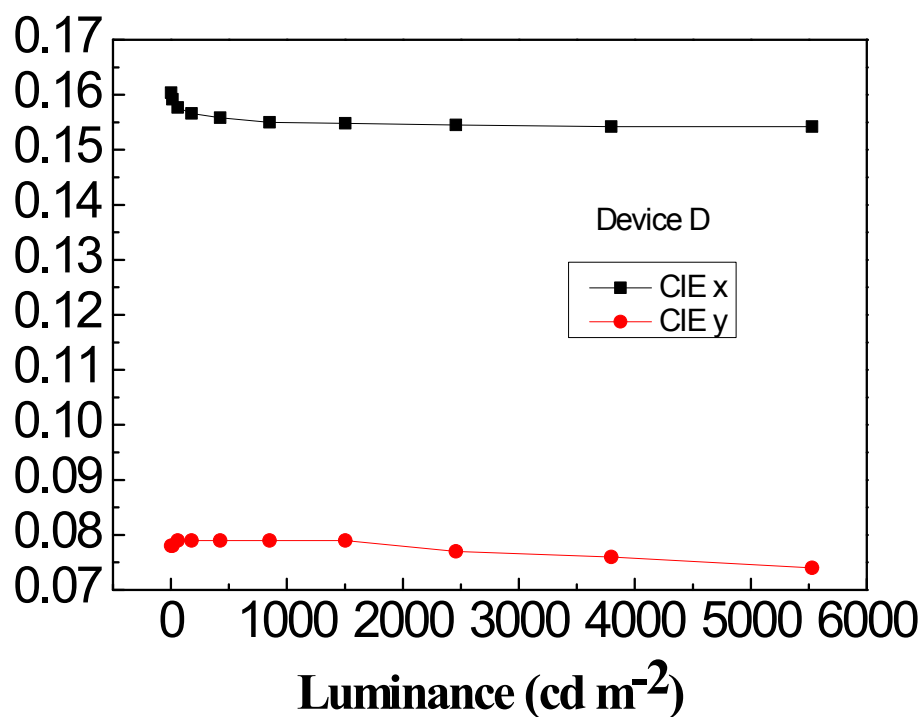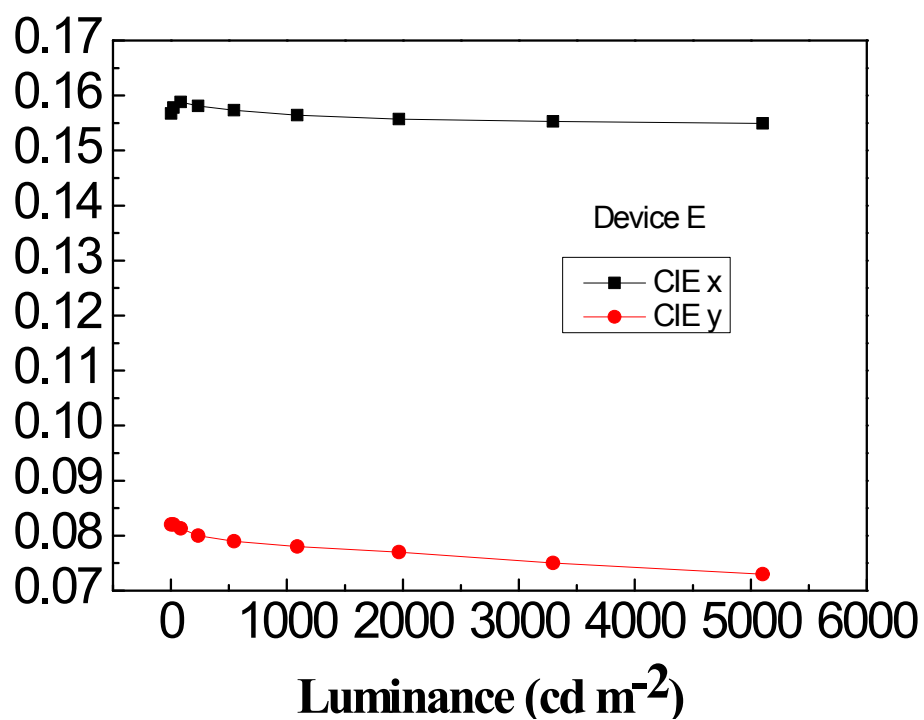

Figure S4. The CIE coordinates versus the voltage of the device A–E.

**Table S1.** Thermal and photophysical properties of the DSFX-TFB.

| Cmpd.    | $\lambda^{\text{abs. max}}$ [a] (nm) | $\lambda^{\text{em. max}}$ ( FWHM) [b]<br>(nm) | $\Phi$ [c] | $T_d / T_g$ [d] (°C) | HOMO/ LUMO/Bandgap [e] (eV) |
|----------|--------------------------------------|------------------------------------------------|------------|----------------------|-----------------------------|
| DSFX-TFB | 322/330                              | 375 (54)/401 ( 54)                             | 0.81/0.66  | 440/ NA              | -5.76/-2.39/ 3.37           |

[a] Maximum absorption measured in chloroform solution and solid film(vacuum deposited on quartz substrates). [b] Maximum emission wavelength and FWHM measured in solution and film. [c] Fluorescence quantum yields in solution/film, using 9,10-diphenyl-anthracence ( $\Phi_{366} = 0.9$ ) as a standard. [d]  $T_d$ : decomposition temperature, measured by TGA;  $T_g$ : glass transition temperature, measured by DSC. [e] HOMO and LUMO energy levels determined by cyclic voltammetry. NA: not available.
